# Supplementary material
Source: publisher figshare collection journal article supplement (https://acs.figshare.com/ndownloader/files/4528033)
Supplement: Supplementary file 1 [file 4528033]

data_global
_publ_requested_journal          J.Org.Chem.
_publ_contact_author_name        'Stephen G. Davies'
_publ_contact_author_address     
;Department of Chemistry
Chemistry Research laboratory
University of Oxford
Mansfield Road
Oxford
OX1 3TA
UK
;
_publ_contact_author_email       steve.davies@chem.ox.ac.uk

_publ_contact_author_phone       '+44 1865 275695'
_publ_contact_author_fax         '+44 1865 275633'
loop_
_publ_author_name
_publ_author_address
'Bond, Christopher W.'
;Department of Chemistry
University of Oxford 
Chemistry Research laboratory
Mansfield Road
Oxford
OX1 3TA
UK
;
'Cresswell, Alexander J.'
;Department of Chemistry
University of Oxford 
Chemistry Research laboratory
Mansfield Road
Oxford
OX1 3TA
UK
;
'Davies, Stephen G.'
;Department of Chemistry
University of Oxford 
Chemistry Research laboratory
Mansfield Road
Oxford
OX1 3TA
UK
;
'Kurosawa, Wataru'
;Department of Chemistry
University of Oxford 
Chemistry Research laboratory
Mansfield Road
Oxford
OX1 3TA
UK
;
'Lee, James A.'
;Department of Chemistry
University of Oxford 
Chemistry Research laboratory
Mansfield Road
Oxford
OX1 3TA
UK
;
'Fletcher, Ai M.'
;Department of Chemistry
University of Oxford 
Chemistry Research laboratory
Mansfield Road
Oxford
OX1 3TA
UK
;
'Roberts, Paul M.'
;Department of Chemistry
University of Oxford 
Chemistry Research laboratory
Mansfield Road
Oxford
OX1 3TA
UK
;
'Russell, Angela J.'
;Department of Chemistry
University of Oxford 
Chemistry Research laboratory
Mansfield Road
Oxford
OX1 3TA
UK
;
'Smith, Anderw D.'
;Department of Chemistry
University of Oxford 
Chemistry Research laboratory
Mansfield Road
Oxford
OX1 3TA
UK
;
'Thomson, James E.'
;Department of Chemistry
University of Oxford 
Chemistry Research laboratory
Mansfield Road
Oxford
OX1 3TA
UK
;
_audit_creation_date             08-09-12
_audit_creation_method           CRYSTALS_ver_12.85

_oxford_structure_analysis_title '9121605 SGD217'
_chemical_name_systematic        ?
_chemical_melting_point          ?

#looking for refcif 


# Check this file using the IUCr facility at: 
# http://checkcif.iucr.org/ 

# The content below is held in the file 'script/refcif.dat'. This is a text 
# file which you may edit to reflect local conditions. 
# Items which need looking at are represented by a '?'. 
# Items for which there are choices are prefixed with 'choose from'. 

_publ_contact_letter             
; 
 Please consider this CIF submission for 
 publication as a Short Format Paper in 
 J.Org.Chem. 
;
_publ_requested_category         EO # choose from: FI FM FO CI CM CO AD 
_publ_requested_coeditor_name    'Dr Angela J Russell'

_publ_section_title              
# Title of paper - generally just the systematic or trivial name 
; Ammonium-directed oxidation of cyclic allylic and homoallylic amines: 
scope and utility
;
loop_
_publ_author_footnote
; 
 ? # Footnote for author 1 
;
; 
 ? # Footnote 2 
;


_publ_section_abstract           
# Text of the abstract 
# (a) The Abstract must be self-contained and comprehensible 
# without the rest of the paper. This means no references 
# to atom names or to compound numbers; compounds must be 
# identified as the title compound, or by name or by some other 
# means such as derivatives of each other (e.g. "the 
# corresponding ketone"). 
# (b) The chemical formula of "the title compound" must be given. 
# (c) Any crystallographic molecular symmetry should be 
# mentioned, and also the presence of more than one molecule 
# in the asymmetric unit (i.e. anything other than Z'=1). 
; 
? 
;

_publ_section_related_literature 
# Not in version 2.3.1 
############################################################### 
# Essential references (e.g. to the origin of the material studied, related 
# structural studies, and to information supporting the reported structure) 
# should be cited in this section, with appropriate very brief explanatory 
# text, for example `The synthesis of the complex is described by Jones 
# (2001). The anhydrous complex has essentially the same coordination 
# geometry (Smith, 2003).' In addition, all references included in the 
# supplementary materials, but not elsewhere in the published article, 
# should be given here. The simple text `For related literature, see:...' 
# may be used, but further details should be provided in the Comment 
# section, which forms part of the supplementary material. 
############################################################### 
; 
? 
;

_publ_section_comment            
# Text of the paper 
# Note that atoms are referenced as N2, not N(2) or N~2~ 
# If text containing () occur within (), the outer ones should be [] 
# Figures should be referenced as Fig. 
; 
? 
;
_publ_section_acknowledgements   # Acknowledgments 
; 
? 
;
_publ_section_figure_captions    
# Captions to figures - Start each caption on a new line after a blank line 
; 
Fig. 1. 
The title compound with displacement ellipsoids drawn at the 50% 
probability level. H atoms are shown as spheres of 
arbitary radius. 
 
;
_symmetry_cell_setting           ?
_symmetry_space_group_name_h-m   ?
_symmetry_int_tables_number      ?
_chemical_absolute_configuration ?
_diffrn_radiation_probe          ?

 
data_1 
 
_publ_section_exptl_refinement 
# Some potentially useful phrases are donated by Bill Clegg: 
; 
In the absence of significant anomalous scattering, Friedel pairs were 
merged. 
 
The absolute configuration was arbitrarily assigned. 
 
The relatively large ratio of minimum to maximum corrections applied 
in the multiscan process (1:nnn) reflect changes in the illuminated 
volume of the crystal. 
 
Changes in illuminated volume were kept to a minimum, and were 
taken into account (G\"orbitz, 1999) by the multi-scan inter-frame 
scaling (DENZO/SCALEPACK, Otwinowski & Minor, 1997). 
 
 
G\"orbitz, C. H. (1999). Acta Cryst. B55, 1090-1098. 
 
 
 
 
The H atoms were all located in a difference map, but those 
attached to carbon atoms were repositioned geometrically. 
The H atoms were initially refined with soft restraints on the 
bond lengths and angles to regularise their geometry 
(C---H in the range 0.93--0.98, 
N---H in the range 0.86--0.89 
N---H to 0.86 
O---H = 0.82 
\%A) 
and 
U~iso~(H) (in the range 1.2-1.5 times U~eq~ of the parent atom), 
after which the positions were refined with riding constraints. 
 
; 
 
_publ_section_exptl_prep 
# Brief details or a reference. Include solvent if known 
; 
? 
; 
 
# Hand-made tables can be put in the cif. The number of columns 
# is set in the loop header. 
# The contants of each column can either be a piece of text 
# without any spaces (eg a number) or other text enclosed in " " 
# Remove the leading # in the following example 
 
#geom_extra_table_head_A 
#; 
#Table 2. 
#Molecular parameters deviating most from MOGUL averages 
#; 
# 
#loop_ 
#_geom_extra_tableA_col_1 
#_geom_extra_tableA_col_2 
#_geom_extra_tableA_col_3 
#_geom_extra_tableA_col_4 
# 
#Parameter "Observed Value" "MOGUL Value" "MOGUL e.s.d" 
#N5-C6-C4 129 124 "7 (\%)" 
#C3-O10-C2 105 109 "2 (\%)" 
#C6-O7 1.25 1.22 ".02 (\%A)" 
# 
# End of 'script/refcif-b.dat' 
#end of refcif 
_cell_length_a                    9.2056(2)
_cell_length_b                    10.1292(2)
_cell_length_c                    14.5600(3)
_cell_angle_alpha                 93.3862(8)
_cell_angle_beta                  104.3284(9)
_cell_angle_gamma                 108.7909(8)
_cell_volume                      1230.97(5)
 
_symmetry_cell_setting            'Triclinic' 
_symmetry_space_group_name_H-M    'P -1 ' 
_symmetry_space_group_name_Hall   ? 
loop_
 _symmetry_equiv_pos_as_xyz
 'x,y,z'
 '-x,-y,-z'

loop_
_atom_type_symbol
_atom_type_scat_dispersion_real
_atom_type_scat_dispersion_imag
_atom_type_scat_Cromer_Mann_a1
_atom_type_scat_Cromer_Mann_b1
_atom_type_scat_Cromer_Mann_a2
_atom_type_scat_Cromer_Mann_b2
_atom_type_scat_Cromer_Mann_a3
_atom_type_scat_Cromer_Mann_b3
_atom_type_scat_Cromer_Mann_a4
_atom_type_scat_Cromer_Mann_b4
_atom_type_scat_Cromer_Mann_c
_atom_type_scat_source  
 C       0.0033   0.0016   2.3100  20.8439   1.0200  10.2075   1.5886   0.5687
   0.8650  51.6512   0.2156 'International Tables Vol C 4.2.6.8 and 6.1.1.4'
 H       0.0000   0.0000   0.4930  10.5109   0.3229  26.1257   0.1402   3.1424
   0.0408  57.7998   0.0030 'International Tables Vol C 4.2.6.8 and 6.1.1.4'
 N       0.0061   0.0033  12.2126   0.0057   3.1322   9.8933   2.0125  28.9975
   1.1663   0.5826 -11.5290 'International Tables Vol C 4.2.6.8 and 6.1.1.4'
 O       0.0106   0.0060   3.0485  13.2771   2.2868   5.7011   1.5463   0.3239
   0.8670  32.9089   0.2508 'International Tables Vol C 4.2.6.8 and 6.1.1.4'
 S       0.1246   0.1234   6.9053   1.4679   5.2034  22.2151   1.4379   0.2536
   1.5863  56.1720   0.8669 'International Tables Vol C 4.2.6.8 and 6.1.1.4'
 
 
_cell_formula_units_Z                    2

# Given Formula = C26 H30 N2 O7 S1 
# Dc =      1.39 Fooo =    544.00 Mu =      1.81 M =    514.60
# Found Formula = C26 H30 N2 O7 S1 
# Dc =      1.39 FOOO =    544.00 Mu =      1.81 M =    514.60

_chemical_formula_sum             'C26 H30 N2 O7 S1'
_chemical_formula_moiety          'C26 H30 N2 O7 S1'
_chemical_compound_source                ?
_chemical_formula_weight            514.60
 
 
_cell_measurement_reflns_used         5149
_cell_measurement_theta_min              5
_cell_measurement_theta_max             27
_cell_measurement_temperature          150
 
_exptl_crystal_description        'plate' 
_exptl_crystal_colour             'colourless' 
_exptl_crystal_size_min           0.05 
_exptl_crystal_size_mid           0.10 
_exptl_crystal_size_max           0.30 
 
_exptl_crystal_density_diffrn     1.388 
_exptl_crystal_density_meas       ? 
_exptl_crystal_density_method     'not measured' 
# Non-dispersive F(000): 
_exptl_crystal_F_000              544 
_exptl_absorpt_coefficient_mu     0.181 
 
# Sheldrick geometric approximatio 0.98 0.99 
_exptl_absorpt_correction_type    multi-scan 
_exptl_absorpt_process_details    'DENZO/SCALEPACK (Otwinowski & Minor, 1997)' 
_exptl_absorpt_correction_T_min   0.98 
_exptl_absorpt_correction_T_max   0.99 
# For a Kappa CCD, set Tmin to 1.0 and 
# Tmax to the ratio of max:min frame scales in scale_all.log 
_diffrn_measurement_device        'Nonius KappaCCD' 
_diffrn_measurement_device_type   'Area' 
_diffrn_radiation_monochromator   'graphite' 
_diffrn_radiation_type            'Mo K\a'
_diffrn_radiation_wavelength           0.71073
_diffrn_measurement_method        \w 
 
# If a reference occurs more than once, delete the author 
# and date from subsequent references. 
_computing_data_collection        'COLLECT (Nonius, 1997-2001).' 
_computing_cell_refinement        'DENZO/SCALEPACK (Otwinowski & Minor, 1997)' 
_computing_data_reduction         'DENZO/SCALEPACK (Otwinowski & Minor, 1997)' 
_computing_structure_solution     'SIR92 (Altomare et al., 1994)' 
_computing_structure_refinement   'CRYSTALS (Betteridge et al., 2003)' 
_computing_publication_material   'CRYSTALS (Betteridge et al., 2003)' 
_computing_molecular_graphics     'CAMERON (Watkin et al., 1996)' 
 
_diffrn_standards_interval_time   . 
_diffrn_standards_interval_count  . 
_diffrn_standards_number          0 
_diffrn_standards_decay_%         ? 
 
_diffrn_ambient_temperature        150
_diffrn_reflns_number             9572 
_reflns_number_total              5611 
_diffrn_reflns_av_R_equivalents   0.021 
# Number of reflections with Friedels Law is 5611 
# Number of reflections without Friedels Law is 0 
# Theoretical number of reflections is about 5700 
 
 
_diffrn_reflns_theta_min          5.169 
_diffrn_reflns_theta_max          27.578 
_diffrn_measured_fraction_theta_max 0.985 
 
_diffrn_reflns_theta_full         27.026 
_diffrn_measured_fraction_theta_full 0.992 
 
 
_diffrn_reflns_limit_h_min        -11 
_diffrn_reflns_limit_h_max        11 
_diffrn_reflns_limit_k_min        -13 
_diffrn_reflns_limit_k_max        12 
_diffrn_reflns_limit_l_min        -18 
_diffrn_reflns_limit_l_max        18 
_reflns_limit_h_min               -11 
_reflns_limit_h_max               11 
_reflns_limit_k_min               -13 
_reflns_limit_k_max               13 
_reflns_limit_l_min               0 
_reflns_limit_l_max               18 
 
_oxford_diffrn_Wilson_B_factor    2.40 
_oxford_diffrn_Wilson_scale       1.90 
 
_atom_sites_solution_primary      direct #heavy,direct,difmap,geom
# _atom_sites_solution_secondary  difmap
_atom_sites_solution_hydrogens    geom
 
_refine_diff_density_min          -0.51 
_refine_diff_density_max          0.44 
 
 
# The current dictionary definitions do not cover the 
# situation where the reflections used for refinement were 
# selected by a user-defined sigma threshold 
 
 
# The values actually used during refinement 
_oxford_reflns_threshold_expression_ref     I>-3.0\s(I)
_refine_ls_number_reflns          5611 
_refine_ls_number_restraints      0 
_refine_ls_number_parameters      325 
_oxford_refine_ls_R_factor_ref    0.0590 
_refine_ls_wR_factor_ref          0.1101 
_refine_ls_goodness_of_fit_ref    0.9545 
_refine_ls_shift/su_max           0.000419 
 
 
# The values computed from all data 
_oxford_reflns_number_all         5611 
_refine_ls_R_factor_all           0.0590 
_refine_ls_wR_factor_all          0.1101 
 
# The values computed with a 2 sigma cutoff - a la SHELX 
_reflns_threshold_expression      I>2.0\s(I)
_reflns_number_gt                 4423 
_refine_ls_R_factor_gt            0.0440 
_refine_ls_wR_factor_gt           0.1020 
 
# choose from: rm (reference molecule of known chirality), 
# ad (anomolous dispersion - Flack), rmad (rm and ad), 
# syn (from synthesis), unk (unknown) or . (not applicable). 
_chemical_absolute_configuration  '.' 
 
 
_refine_ls_structure_factor_coef  Fsqd 
_refine_ls_matrix_type            full
_refine_ls_hydrogen_treatment     constr         # none, undef, noref, refall,
                                                 # refxyz, refU, constr or mixed
_refine_ls_weighting_scheme       calc 
_refine_ls_weighting_details 
;
 Method= Modified Sheldrick 
 w=1/[\s^2^(F^2^) + ( 0.05P)^2^ + 0.79P] 
 ,where P=(max(Fo^2^,0) + 2Fc^2^)/3 
;
# Insert your own references if required - in alphabetical order 
_publ_section_references 
; 
Altomare, A., Cascarano, G., Giacovazzo, C., Guagliardi, A., Burla, M.C., 
Polidori, G. & Camalli, M. (1994). J. Appl. Cryst. 27, 435. 
 
Betteridge, P.W., Carruthers, J.R., Cooper, R.I., 
Prout, K. & Watkin, D.J. (2003). J. Appl. Cryst. 36, 1487. 
 
Nonius (1997-2001). COLLECT. Nonius BV, Delft, The Netherlands. 
 
Otwinowski, Z. & Minor, W. (1997). Methods in Enzymology, Vol. 276, 
edited by C. W. Carter Jr & R. M. Sweet, pp. 307--326. 
New York: Academic Press. 
 
Watkin, D.J., Prout, C.K. & Pearce, L.J. (1996). CAMERON, Chemical 
Crystallography Laboratory, Oxford, UK. 
; 

# Uequiv = arithmetic mean of Ui i.e. Ueqiv = (U1+U2+U3)/3

# Replace last . with number of unfound hydrogen atomsattached to an atom.

# ..._refinement_flags_... 
# . no refinement constraints           S special position constraint on site
# G rigid group refinement of site      R riding atom
# D distance or angle restraint on site T thermal displacement constraints
# U Uiso or Uij restraint (rigid bond)  P partial occupancy constraint


loop_
_atom_site_label
_atom_site_type_symbol
_atom_site_fract_x
_atom_site_fract_y
_atom_site_fract_z
_atom_site_U_iso_or_equiv
_atom_site_occupancy
_atom_site_adp_type
_atom_site_refinement_flags_posn
_atom_site_refinement_flags_adp
_atom_site_refinement_flags_occupancy
_atom_site_disorder_assembly
_atom_site_disorder_group
_oxford_atom_site_special_shape
_atom_site_attached_hydrogens
S1 S 0.27540(5) 0.76567(4) 0.27288(3) 0.0269 1.0000 Uani . . . . . . . 
O2 O 0.27520(15) 0.89437(12) 0.23393(9) 0.0353 1.0000 Uani . . . . . . . 
O3 O 0.41572(14) 0.72946(14) 0.27165(9) 0.0370 1.0000 Uani . . . . . . . 
O4 O 0.24690(14) 0.76432(13) 0.36705(8) 0.0312 1.0000 Uani . . . . . . . 
C5 C 0.10936(18) 0.62584(17) 0.19540(11) 0.0247 1.0000 Uani . . . . . . . 
C6 C 0.00990(18) 0.65970(17) 0.11946(11) 0.0259 1.0000 Uani . . . . . . . 
C7 C -0.1232(2) 0.55121(19) 0.06200(12) 0.0306 1.0000 Uani . . . . . . . 
N8 N -0.22991(19) 0.58249(19) -0.01950(11) 0.0412 1.0000 Uani . . . . . . . 
O9 O -0.18920(19) 0.69905(17) -0.04322(11) 0.0554 1.0000 Uani . . . . . . . 
O10 O -0.3534(2) 0.4878(2) -0.06237(15) 0.0914 1.0000 Uani . . . . . . . 
C11 C -0.1593(2) 0.41319(19) 0.07827(13) 0.0367 1.0000 Uani . . . . . . . 
C12 C -0.0578(2) 0.38228(19) 0.15361(13) 0.0366 1.0000 Uani . . . . . . . 
C13 C 0.0792(2) 0.48630(18) 0.21354(12) 0.0304 1.0000 Uani . . . . . . . 
C14 C 0.1868(3) 0.4438(2) 0.29205(15) 0.0428 1.0000 Uani . . . . . . . 
O15 O 0.80175(14) 1.06711(12) 0.49802(9) 0.0334 1.0000 Uani . . . . . . . 
C16 C 0.69049(19) 0.92702(16) 0.47823(11) 0.0253 1.0000 Uani . . . . . . . 
C17 C 0.63771(19) 0.86998(17) 0.56437(11) 0.0267 1.0000 Uani . . . . . . . 
O18 O 0.77217(14) 0.90198(13) 0.64647(8) 0.0350 1.0000 Uani . . . . . . . 
C19 C 0.5657(2) 0.71216(17) 0.53046(12) 0.0301 1.0000 Uani . . . . . . . 
C20 C 0.6717(2) 0.67989(18) 0.47218(13) 0.0322 1.0000 Uani . . . . . . . 
C21 C 0.76264(19) 0.82192(17) 0.44482(11) 0.0251 1.0000 Uani . . . . . . . 
N22 N 0.74995(15) 0.81061(13) 0.33806(9) 0.0235 1.0000 Uani . . . . . . . 
C23 C 0.84618(19) 0.72583(17) 0.31009(13) 0.0289 1.0000 Uani . . . . . . . 
C24 C 0.77422(19) 0.56927(17) 0.30547(11) 0.0268 1.0000 Uani . . . . . . . 
C25 C 0.6305(2) 0.49297(18) 0.23742(12) 0.0315 1.0000 Uani . . . . . . . 
C26 C 0.5643(2) 0.3476(2) 0.23082(14) 0.0400 1.0000 Uani . . . . . . . 
C27 C 0.6423(3) 0.2770(2) 0.29143(16) 0.0459 1.0000 Uani . . . . . . . 
C28 C 0.7867(3) 0.3512(2) 0.35910(15) 0.0452 1.0000 Uani . . . . . . . 
C29 C 0.8524(2) 0.4966(2) 0.36612(13) 0.0367 1.0000 Uani . . . . . . . 
C30 C 0.8034(2) 0.95419(17) 0.30703(12) 0.0298 1.0000 Uani . . . . . . . 
C31 C 0.7772(2) 0.94975(18) 0.20026(12) 0.0298 1.0000 Uani . . . . . . . 
C32 C 0.9038(2) 1.02025(18) 0.16594(13) 0.0334 1.0000 Uani . . . . . . . 
C33 C 0.8811(2) 1.0304(2) 0.06907(14) 0.0396 1.0000 Uani . . . . . . . 
C34 C 0.7343(3) 0.9669(2) 0.00522(15) 0.0505 1.0000 Uani . . . . . . . 
C35 C 0.6082(3) 0.8924(4) 0.03770(17) 0.0785 1.0000 Uani . . . . . . . 
C36 C 0.6283(3) 0.8850(3) 0.13504(16) 0.0637 1.0000 Uani . . . . . . . 
H61 H 0.0331 0.7562 0.1072 0.0322 1.0000 Uiso R . . . . . . 
H111 H -0.2537 0.3397 0.0368 0.0401 1.0000 Uiso R . . . . . . 
H121 H -0.0823 0.2847 0.1658 0.0437 1.0000 Uiso R . . . . . . 
H141 H 0.1363 0.3454 0.2965 0.0659 1.0000 Uiso R . . . . . . 
H143 H 0.2863 0.4569 0.2771 0.0673 1.0000 Uiso R . . . . . . 
H142 H 0.2076 0.5014 0.3527 0.0655 1.0000 Uiso R . . . . . . 
H161 H 0.5906 0.9185 0.4248 0.0303 1.0000 Uiso R . . . . . . 
H171 H 0.5594 0.9123 0.5789 0.0319 1.0000 Uiso R . . . . . . 
H192 H 0.4563 0.6877 0.4884 0.0379 1.0000 Uiso R . . . . . . 
H191 H 0.5665 0.6603 0.5858 0.0372 1.0000 Uiso R . . . . . . 
H202 H 0.6062 0.6127 0.4138 0.0424 1.0000 Uiso R . . . . . . 
H201 H 0.7477 0.6417 0.5105 0.0423 1.0000 Uiso R . . . . . . 
H211 H 0.8771 0.8550 0.4781 0.0309 1.0000 Uiso R . . . . . . 
H232 H 0.8558 0.7478 0.2459 0.0375 1.0000 Uiso R . . . . . . 
H231 H 0.9517 0.7641 0.3571 0.0372 1.0000 Uiso R . . . . . . 
H251 H 0.5777 0.5422 0.1950 0.0388 1.0000 Uiso R . . . . . . 
H261 H 0.4634 0.2970 0.1844 0.0483 1.0000 Uiso R . . . . . . 
H271 H 0.5975 0.1761 0.2871 0.0609 1.0000 Uiso R . . . . . . 
H281 H 0.8395 0.3011 0.4009 0.0622 1.0000 Uiso R . . . . . . 
H291 H 0.9543 0.5487 0.4130 0.0495 1.0000 Uiso R . . . . . . 
H302 H 0.7418 1.0072 0.3281 0.0373 1.0000 Uiso R . . . . . . 
H301 H 0.9178 0.9987 0.3414 0.0366 1.0000 Uiso R . . . . . . 
H321 H 1.0086 1.0637 0.2109 0.0424 1.0000 Uiso R . . . . . . 
H331 H 0.9713 1.0812 0.0466 0.0518 1.0000 Uiso R . . . . . . 
H341 H 0.7196 0.9732 -0.0624 0.0589 1.0000 Uiso R . . . . . . 
H351 H 0.5038 0.8474 -0.0071 0.0794 1.0000 Uiso R . . . . . . 
H361 H 0.5393 0.8364 0.1575 0.0663 1.0000 Uiso R . . . . . . 
H221 H 0.6440 0.7657 0.3050 0.0359 1.0000 Uiso R . . . . . . 
H181 H 0.7653 0.9674 0.6832 0.0536 1.0000 Uiso R . . . . . . 
H151 H 0.7844 1.1144 0.5422 0.0498 1.0000 Uiso R . . . . . . 
loop_
_atom_site_aniso_label
_atom_site_aniso_U_11
_atom_site_aniso_U_22
_atom_site_aniso_U_33
_atom_site_aniso_U_23
_atom_site_aniso_U_13
_atom_site_aniso_U_12
S1 0.02093(19) 0.0298(2) 0.0265(2) -0.00242(15) 0.00506(15) 0.00655(15) 
O2 0.0385(7) 0.0267(6) 0.0335(6) 0.0010(5) 0.0070(5) 0.0051(5) 
O3 0.0198(6) 0.0487(8) 0.0387(7) -0.0038(6) 0.0069(5) 0.0099(5) 
O4 0.0311(6) 0.0355(6) 0.0256(6) -0.0019(5) 0.0067(5) 0.0121(5) 
C5 0.0217(7) 0.0273(8) 0.0259(8) -0.0006(6) 0.0091(6) 0.0087(6) 
C6 0.0242(8) 0.0295(8) 0.0250(8) 0.0004(6) 0.0088(6) 0.0098(6) 
C7 0.0250(8) 0.0389(9) 0.0253(8) 0.0001(7) 0.0058(6) 0.0097(7) 
N8 0.0333(8) 0.0516(10) 0.0310(8) 0.0006(7) 0.0003(7) 0.0119(7) 
O9 0.0502(9) 0.0577(10) 0.0520(9) 0.0128(7) -0.0019(7) 0.0220(8) 
O10 0.0590(11) 0.0795(13) 0.0781(13) 0.0133(10) -0.0393(10) -0.0080(10) 
C11 0.0297(9) 0.0347(9) 0.0343(9) -0.0060(7) 0.0060(7) 0.0004(7) 
C12 0.0399(10) 0.0271(9) 0.0394(10) 0.0009(7) 0.0123(8) 0.0071(7) 
C13 0.0318(9) 0.0294(8) 0.0320(9) 0.0021(7) 0.0105(7) 0.0128(7) 
C14 0.0472(11) 0.0361(10) 0.0458(11) 0.0093(8) 0.0066(9) 0.0199(9) 
O15 0.0364(7) 0.0244(6) 0.0371(7) -0.0036(5) 0.0163(5) 0.0045(5) 
C16 0.0243(8) 0.0239(8) 0.0270(8) -0.0001(6) 0.0064(6) 0.0086(6) 
C17 0.0242(8) 0.0305(8) 0.0263(8) 0.0026(6) 0.0064(6) 0.0117(6) 
O18 0.0352(7) 0.0416(7) 0.0264(6) -0.0019(5) 0.0015(5) 0.0176(6) 
C19 0.0308(8) 0.0293(9) 0.0307(9) 0.0044(7) 0.0105(7) 0.0097(7) 
C20 0.0420(10) 0.0285(9) 0.0313(9) 0.0056(7) 0.0145(8) 0.0158(7) 
C21 0.0249(8) 0.0274(8) 0.0231(7) 0.0013(6) 0.0052(6) 0.0109(6) 
N22 0.0213(6) 0.0239(6) 0.0253(6) 0.0007(5) 0.0060(5) 0.0087(5) 
C23 0.0239(8) 0.0310(9) 0.0347(9) -0.0007(7) 0.0102(7) 0.0126(7) 
C24 0.0291(8) 0.0312(8) 0.0247(8) 0.0014(6) 0.0086(7) 0.0163(7) 
C25 0.0326(9) 0.0338(9) 0.0294(8) 0.0004(7) 0.0066(7) 0.0158(7) 
C26 0.0377(10) 0.0349(10) 0.0442(11) -0.0057(8) 0.0137(8) 0.0089(8) 
C27 0.0580(13) 0.0334(10) 0.0600(13) 0.0107(9) 0.0351(11) 0.0194(9) 
C28 0.0625(13) 0.0487(12) 0.0466(11) 0.0207(9) 0.0259(10) 0.0383(11) 
C29 0.0389(10) 0.0481(11) 0.0321(9) 0.0070(8) 0.0097(8) 0.0272(9) 
C30 0.0340(9) 0.0251(8) 0.0303(8) 0.0037(7) 0.0117(7) 0.0084(7) 
C31 0.0316(9) 0.0300(8) 0.0294(8) 0.0050(7) 0.0104(7) 0.0114(7) 
C32 0.0330(9) 0.0303(9) 0.0389(10) 0.0064(7) 0.0138(8) 0.0106(7) 
C33 0.0479(11) 0.0355(10) 0.0425(10) 0.0089(8) 0.0251(9) 0.0139(8) 
C34 0.0613(14) 0.0541(13) 0.0304(10) 0.0072(9) 0.0162(10) 0.0098(10) 
C35 0.0477(14) 0.115(2) 0.0347(12) 0.0168(13) 0.0004(10) -0.0138(14) 
C36 0.0345(11) 0.0988(19) 0.0369(11) 0.0210(12) 0.0091(9) -0.0056(11) 

_refine_ls_extinction_method 
    'None'
_oxford_refine_ls_scale 0.7511(18) 
loop_
 _geom_bond_atom_site_label_1
 _geom_bond_site_symmetry_1
 _geom_bond_atom_site_label_2
 _geom_bond_site_symmetry_2
 _geom_bond_distance
 _geom_bond_publ_flag
S1 . O2 . 1.4524(13)    yes
S1 . O3 . 1.4559(12)    yes
S1 . O4 . 1.4584(12)    yes
S1 . C5 . 1.7827(16)    yes
C5 . C6 . 1.387(2)    yes
C5 . C13 . 1.404(2)    yes
C6 . C7 . 1.388(2)    yes
C6 . H61 . 0.969    no
C7 . N8 . 1.463(2)    yes
C7 . C11 . 1.378(3)    yes
N8 . O9 . 1.217(2)    yes
N8 . O10 . 1.216(2)    yes
C11 . C12 . 1.377(3)    yes
C11 . H111 . 0.972    no
C12 . C13 . 1.398(2)    yes
C12 . H121 . 0.977    no
C13 . C14 . 1.499(2)    yes
C14 . H141 . 0.968    no
C14 . H143 . 0.963    no
C14 . H142 . 0.970    no
O15 . C16 . 1.4194(19)    yes
O15 . H151 . 0.856    no
C16 . C17 . 1.533(2)    yes
C16 . C21 . 1.538(2)    yes
C16 . H161 . 1.023    no
C17 . O18 . 1.4246(19)    yes
C17 . C19 . 1.517(2)    yes
C17 . H171 . 1.006    no
O18 . H181 . 0.855    no
C19 . C20 . 1.536(2)    yes
C19 . H192 . 0.984    no
C19 . H191 . 0.988    no
C20 . C21 . 1.545(2)    yes
C20 . H202 . 0.982    no
C20 . H201 . 0.978    no
C21 . N22 . 1.5243(19)    yes
C21 . H211 . 0.979    no
N22 . C23 . 1.5217(19)    yes
N22 . C30 . 1.513(2)    yes
N22 . H221 . 0.920    no
C23 . C24 . 1.499(2)    yes
C23 . H232 . 0.992    no
C23 . H231 . 0.980    no
C24 . C25 . 1.390(2)    yes
C24 . C29 . 1.394(2)    yes
C25 . C26 . 1.387(3)    yes
C25 . H251 . 0.954    no
C26 . C27 . 1.378(3)    yes
C26 . H261 . 0.962    no
C27 . C28 . 1.387(3)    yes
C27 . H271 . 0.962    no
C28 . C29 . 1.386(3)    yes
C28 . H281 . 0.956    no
C29 . H291 . 0.973    no
C30 . C31 . 1.509(2)    yes
C30 . H302 . 0.984    no
C30 . H301 . 0.984    no
C31 . C32 . 1.382(2)    yes
C31 . C36 . 1.384(3)    yes
C32 . C33 . 1.389(3)    yes
C32 . H321 . 0.966    no
C33 . C34 . 1.361(3)    yes
C33 . H331 . 0.969    no
C34 . C35 . 1.375(3)    yes
C34 . H341 . 0.969    no
C35 . C36 . 1.393(3)    yes
C35 . H351 . 0.964    no
C36 . H361 . 0.955    no
loop_
 _geom_angle_atom_site_label_1
 _geom_angle_site_symmetry_1
 _geom_angle_atom_site_label_2
 _geom_angle_site_symmetry_2
 _geom_angle_atom_site_label_3
 _geom_angle_site_symmetry_3
 _geom_angle
 _geom_angle_publ_flag
O2 . S1 . O3 . 113.48(8)    yes
O2 . S1 . O4 . 112.98(7)    yes
O3 . S1 . O4 . 111.95(8)    yes
O2 . S1 . C5 . 106.57(7)    yes
O3 . S1 . C5 . 105.60(7)    yes
O4 . S1 . C5 . 105.48(7)    yes
S1 . C5 . C6 . 118.20(12)    yes
S1 . C5 . C13 . 120.10(12)    yes
C6 . C5 . C13 . 121.67(15)    yes
C5 . C6 . C7 . 117.93(15)    yes
C5 . C6 . H61 . 120.8    no
C7 . C6 . H61 . 121.3    no
C6 . C7 . N8 . 119.53(16)    yes
C6 . C7 . C11 . 122.40(16)    yes
N8 . C7 . C11 . 118.07(15)    yes
C7 . N8 . O9 . 119.12(15)    yes
C7 . N8 . O10 . 117.62(18)    yes
O9 . N8 . O10 . 123.20(18)    yes
C7 . C11 . C12 . 118.49(16)    yes
C7 . C11 . H111 . 120.3    no
C12 . C11 . H111 . 121.2    no
C11 . C12 . C13 . 122.00(17)    yes
C11 . C12 . H121 . 119.1    no
C13 . C12 . H121 . 118.9    no
C5 . C13 . C12 . 117.50(16)    yes
C5 . C13 . C14 . 123.59(16)    yes
C12 . C13 . C14 . 118.90(16)    yes
C13 . C14 . H141 . 109.4    no
C13 . C14 . H143 . 108.9    no
H141 . C14 . H143 . 109.5    no
C13 . C14 . H142 . 110.1    no
H141 . C14 . H142 . 109.7    no
H143 . C14 . H142 . 109.3    no
C16 . O15 . H151 . 109.4    no
O15 . C16 . C17 . 115.07(13)    yes
O15 . C16 . C21 . 111.16(13)    yes
C17 . C16 . C21 . 103.82(13)    yes
O15 . C16 . H161 . 110.6    no
C17 . C16 . H161 . 108.3    no
C21 . C16 . H161 . 107.4    no
C16 . C17 . O18 . 110.59(13)    yes
C16 . C17 . C19 . 102.44(13)    yes
O18 . C17 . C19 . 110.37(13)    yes
C16 . C17 . H171 . 109.9    no
O18 . C17 . H171 . 109.6    no
C19 . C17 . H171 . 113.7    no
C17 . O18 . H181 . 105.1    no
C17 . C19 . C20 . 105.38(13)    yes
C17 . C19 . H192 . 109.8    no
C20 . C19 . H192 . 109.2    no
C17 . C19 . H191 . 110.4    no
C20 . C19 . H191 . 111.0    no
H192 . C19 . H191 . 110.9    no
C19 . C20 . C21 . 106.07(13)    yes
C19 . C20 . H202 . 110.8    no
C21 . C20 . H202 . 109.6    no
C19 . C20 . H201 . 110.8    no
C21 . C20 . H201 . 110.0    no
H202 . C20 . H201 . 109.5    no
C16 . C21 . C20 . 105.13(13)    yes
C16 . C21 . N22 . 113.25(12)    yes
C20 . C21 . N22 . 111.99(12)    yes
C16 . C21 . H211 . 108.7    no
C20 . C21 . H211 . 111.8    no
N22 . C21 . H211 . 106.0    no
C21 . N22 . C23 . 112.18(12)    yes
C21 . N22 . C30 . 111.84(12)    yes
C23 . N22 . C30 . 108.93(12)    yes
C21 . N22 . H221 . 107.8    no
C23 . N22 . H221 . 108.5    no
C30 . N22 . H221 . 107.4    no
N22 . C23 . C24 . 115.40(13)    yes
N22 . C23 . H232 . 105.4    no
C24 . C23 . H232 . 109.4    no
N22 . C23 . H231 . 105.5    no
C24 . C23 . H231 . 111.2    no
H232 . C23 . H231 . 109.6    no
C23 . C24 . C25 . 120.19(15)    yes
C23 . C24 . C29 . 121.07(16)    yes
C25 . C24 . C29 . 118.68(16)    yes
C24 . C25 . C26 . 120.84(17)    yes
C24 . C25 . H251 . 118.9    no
C26 . C25 . H251 . 120.3    no
C25 . C26 . C27 . 119.96(18)    yes
C25 . C26 . H261 . 119.6    no
C27 . C26 . H261 . 120.4    no
C26 . C27 . C28 . 119.98(18)    yes
C26 . C27 . H271 . 120.5    no
C28 . C27 . H271 . 119.6    no
C27 . C28 . C29 . 120.09(18)    yes
C27 . C28 . H281 . 119.2    no
C29 . C28 . H281 . 120.7    no
C24 . C29 . C28 . 120.44(18)    yes
C24 . C29 . H291 . 119.3    no
C28 . C29 . H291 . 120.2    no
N22 . C30 . C31 . 114.14(13)    yes
N22 . C30 . H302 . 106.8    no
C31 . C30 . H302 . 108.9    no
N22 . C30 . H301 . 105.9    no
C31 . C30 . H301 . 110.7    no
H302 . C30 . H301 . 110.2    no
C30 . C31 . C32 . 119.24(15)    yes
C30 . C31 . C36 . 122.40(16)    yes
C32 . C31 . C36 . 118.23(17)    yes
C31 . C32 . C33 . 120.98(17)    yes
C31 . C32 . H321 . 118.6    no
C33 . C32 . H321 . 120.4    no
C32 . C33 . C34 . 120.54(18)    yes
C32 . C33 . H331 . 119.6    no
C34 . C33 . H331 . 119.8    no
C33 . C34 . C35 . 119.23(19)    yes
C33 . C34 . H341 . 120.2    no
C35 . C34 . H341 . 120.6    no
C34 . C35 . C36 . 120.8(2)    yes
C34 . C35 . H351 . 119.7    no
C36 . C35 . H351 . 119.5    no
C35 . C36 . C31 . 120.17(19)    yes
C35 . C36 . H361 . 120.4    no
C31 . C36 . H361 . 119.4    no
loop_
 _geom_hbond_atom_site_label_D
 _geom_hbond_site_symmetry_D
 _geom_hbond_atom_site_label_H
 _geom_hbond_site_symmetry_H
 _geom_hbond_atom_site_label_A
 _geom_hbond_site_symmetry_A
 _geom_hbond_angle_DHA
 _geom_hbond_distance_DH
 _geom_hbond_distance_HA
 _geom_hbond_distance_DA
 _geom_hbond_publ_flag
C14 . H142 . O4 . 123 0.97 2.56 3.188(3)    yes
C25 . H251 . O10 2_565 144 0.95 2.37 3.194(3)    yes
C32 . H321 . O18 2_776 158 0.97 2.43 3.343(3)    yes
C33 . H331 . O9 2_675 152 0.97 2.48 3.367(3)    yes
C36 . H361 . O3 . 155 0.95 2.36 3.252(3)    yes
N22 . H221 . O3 . 156 0.92 1.94 2.807(3)    yes
O18 . H181 . O2 2_676 174 0.86 1.98 2.830(3)    yes
O15 . H151 . O4 2_676 174 0.86 1.89 2.740(3)    yes
